# Supplementary material for: High-throughput metabolomics for evaluating the efficacy and discovering the metabolic mechanism of Luozhen capsules from the excessive liver-fire syndrome of hypertension
Source: PubMed Central journal article supplement — RSC Adv. 2019 Oct 9;9(55):32141–53. doi: 10.1039/c9ra06622e (PMC9072971; doi:10.1039/c9ra06622e), 2019-10-09
Supplement: RA-009-C9RA06622E-s001.pdf [file RA-009-C9RA06622E-s001.pdf]

**Table.S1** The gradient program for urine sample.

| Time<br>(min) | Flow rate<br>(mL·min <sup>-1</sup> ) | Solvent A (%) | Solvent B (%) | Curve |
|---------------|--------------------------------------|---------------|---------------|-------|
| Initial       | 0.4                                  | 1             | 99            | 6     |
| 4             | 0.4                                  | 14            | 86            | 6     |
| 8             | 0.4                                  | 42            | 58            | 6     |
| 9             | 0.4                                  | 100           | 0             | 6     |
| 10            | 0.4                                  | 100           | 0             | 6     |
| 11            | 0.4                                  | 1             | 99            | 6     |
| 12            | 0.4                                  | 1             | 99            | 6     |

**Table.S2** Urine potential biomarkers identified in positive and negative mode

| NO. | Rt<br>min | M/Z<br>Determined | M/Z<br>Calculate<br>d | Scan<br>Mode | Proposed<br>Composition                                         | Postulated Identity                         | Change<br>Trend |
|-----|-----------|-------------------|-----------------------|--------------|-----------------------------------------------------------------|---------------------------------------------|-----------------|
| 1   | 0.61      | 195.0510          | 195.0510              | ESI-         | C <sub>6</sub> H <sub>12</sub> O <sub>7</sub>                   | Galactonic acid                             | ↓               |
| 2   | 0.62      | 177.0400          | 177.0400              | ESI-         | C <sub>6</sub> H <sub>10</sub> O <sub>6</sub>                   | 3-Keto-b-D-galactose                        | ↓               |
| 3   | 0.68      | 300.0395          | 300.0395              | ESI-         | C <sub>8</sub> H <sub>15</sub> NO <sub>9</sub> S                | N-Acetylgalactosamine 4-sulphate            | ↓               |
| 4   | 0.87      | 170.0928          | 170.0928              | ESI+         | C <sub>7</sub> H <sub>11</sub> N <sub>3</sub> O <sub>2</sub>    | 1-Methylhistidine                           | ↓               |
| 5   | 1.13      | 138.0919          | 138.0919              | ESI+         | C <sub>8</sub> H <sub>11</sub> NO                               | 2-Hydroxyphenethylamine                     | ↑               |
| 6   | 1.14      | 121.0654          | 121.0654              | ESI+         | C <sub>8</sub> H <sub>8</sub> O                                 | Phenylacetaldehyde                          | ↑               |
| 7   | 1.23      | 191.0195          | 191.0195              | ESI-         | C <sub>6</sub> H <sub>8</sub> O <sub>7</sub>                    | 2,3-Diketo-L-gulonate                       | ↑               |
| 8   | 1.37      | 282.1208          | 282.1208              | ESI+         | C <sub>11</sub> H <sub>15</sub> N <sub>5</sub> O <sub>4</sub>   | 2'-O-Methyladenosine                        | ↑               |
| 9   | 1.43      | 231.0979          | 231.0979              | ESI-         | C <sub>9</sub> H <sub>16</sub> N <sub>2</sub> O <sub>5</sub>    | 4-butanoate                                 | ↓               |
| 10  | 1.51      | 314.1226          | 314.1226              | ESI+         | C <sub>14</sub> H <sub>19</sub> NO <sub>7</sub>                 | Tyramine glucuronide                        | ↑               |
| 11  | 1.94      | 330.0611          | 330.0611              | ESI+         | C <sub>10</sub> H <sub>12</sub> N <sub>5</sub> O <sub>6</sub> P | Adenosine2',3'-cyclic phosphate             | ↑               |
| 12  | 1.99      | 166.0504          | 166.0504              | ESI+         | C <sub>8</sub> H <sub>7</sub> NO <sub>3</sub>                   | 4-Pyridoxolactone                           | ↓               |
| 13  | 2.0       | 346.0558          | 346.0558              | ESI+         | C <sub>10</sub> H <sub>12</sub> N <sub>5</sub> O <sub>7</sub> P | Guanosine2',3'-cyclic phosphate             | ↑               |
| 14  | 2.20      | 130.0867          | 130.0867              | ESI+         | C <sub>6</sub> H <sub>11</sub> NO <sub>2</sub>                  | Pipecolic acid                              | ↑               |
| 15  | 2.34      | 189.1239          | 189.1239              | ESI+         | C <sub>8</sub> H <sub>16</sub> N <sub>2</sub> O <sub>3</sub>    | Glycyl-L-leucine                            | ↑               |
| 16  | 2.47      | 168.0659          | 168.0659              | ESI+         | C <sub>8</sub> H <sub>9</sub> NO <sub>3</sub>                   | Pyridoxal                                   | ↑               |
| 17  | 2.75      | 209.0929          | 209.0929              | ESI+         | C <sub>10</sub> H <sub>12</sub> N <sub>2</sub> O <sub>3</sub>   | Formyl-5-hydroxykynurenamine                | ↓               |
| 18  | 3.21      | 197.0450          | 197.0450              | ESI-         | C <sub>9</sub> H <sub>10</sub> O <sub>5</sub>                   | 3-(3,4-Dihydroxyphenyl)lactic acid          | ↑               |
| 19  | 3.45      | 194.0450          | 194.0450              | ESI-         | C <sub>9</sub> H <sub>9</sub> NO <sub>4</sub>                   | Dopaquinone                                 | ↑               |
| 20  | 3.57      | 181.0497          | 181.0497              | ESI-         | C <sub>9</sub> H <sub>10</sub> O <sub>4</sub>                   | 3-Methoxy-4-hydroxyphenylglycol aldehyde    | ↑               |
| 21  | 3.92      | 180.0657          | 180.0657              | ESI-         | C <sub>9</sub> H <sub>11</sub> NO <sub>3</sub>                  | Beta-Tyrosine                               | ↑               |
| 22  | 3.95      | 182.0819          | 182.0819              | ESI+         | C <sub>9</sub> H <sub>11</sub> NO <sub>3</sub>                  | L-Tyrosine                                  | ↑               |
| 23  | 4.26      | 179.0343          | 179.0343              | ESI-         | C <sub>9</sub> H <sub>8</sub> O <sub>4</sub>                    | 3,4-Dihydroxy-trans-cinnamate               | ↑               |
| 24  | 4.38      | 165.0550          | 165.0550              | ESI-         | C <sub>9</sub> H <sub>10</sub> O <sub>3</sub>                   | Homovanillin                                | ↑               |
| 25  | 4.48      | 167.0708          | 167.0708              | ESI+         | C <sub>9</sub> H <sub>10</sub> O <sub>3</sub>                   | D-Phenyllactic acid                         | ↓               |
| 26  | 4.51      | 134.0615          | 134.0615              | ESI-         | C <sub>8</sub> H <sub>9</sub> NO                                | N-Acetylarylamine                           | ↑               |
| 27  | 5.51      | 181.0494          | 181.0494              | ESI+         | C <sub>9</sub> H <sub>8</sub> O <sub>4</sub>                    | 4-Hydroxyphenylpyruvic acid                 | ↑               |
| 28  | 5.70      | 194.0453          | 194.0453              | ESI-         | C <sub>9</sub> H <sub>9</sub> NO <sub>4</sub>                   | Leucodopachrome                             | ↑               |
| 29  | 5.76      | 181.0501          | 181.0501              | ESI+         | C <sub>9</sub> H <sub>8</sub> O <sub>4</sub>                    | 2-Hydroxy-3-(4-hydroxyphenyl)propenoic acid | ↓               |
| 30  | 5.91      | 167.0708          | 167.0708              | ESI+         | C <sub>9</sub> H <sub>10</sub> O <sub>3</sub>                   | Phenyllactic acid                           | ↑               |
| 31  | 6.18      | 204.0658          | 204.0658              | ESI-         | C <sub>11</sub> H <sub>11</sub> NO <sub>3</sub>                 | Indolelactic acid                           | ↑               |
| 32  | 7.77      | 193.0345          | 193.0345              | ESI-         | C <sub>6</sub> H <sub>10</sub> O <sub>7</sub>                   | 3-Dehydro-L-gulonate                        | ↓               |

**Note:** ↑↓It indicates that the level of urine in rats with Liver-fired Type hypertensive model is increased or decreased.

**Table.S3** Secondary fragment Information of potential biomarkers in urine sample.

| Rt min | Scan Mode | Actual-M | Postulated Identify              | MS/MS fragmentation(m/z)                                                                                                                                                   |
|--------|-----------|----------|----------------------------------|----------------------------------------------------------------------------------------------------------------------------------------------------------------------------|
| 0.61   | ESI-      | 195.0510 | Galactonic acid                  | 195.0510[M-H]-,147.0293[M-H-CH4O2]-,129.0188[M-H-CH6O3]-, 96.9926[M-H-C2H10O4]-, 75.0033[M-H-C4H8O4]-                                                                      |
| 0.62   | ESI-      | 177.0400 | 3-Keto-b-D-galactose             | 177.0399[M-H]-,162.0528[M-H-O]-,143.0344[M-H-O-H2O2]-,131.0344[M-H-CH2O2]-, 125.0239[M-H-H4O3]-                                                                            |
| 0.68   | ESI-      | 300.0395 | N-Acetylgalactosamine 4-sulphate | 300.0389[M-H]-,199.0276[M-H-C3H3NO3]-,181.0171[M-H-C3H5NO4]-,139.0269[M-H-C2H9O6S]-,101.0603[M-H-C3H5NO7S]-                                                                |
| 0.87   | ESI+      | 170.0928 | 1-Methylhistidine                | 170.0930[M+H]+,153.0902[M+H-HO]+,124.0875[M+H-CH2O2]+,116.0374[M+H-H8NO2]+, 109.0766[M+H-CH3NO2]+                                                                          |
| 1.13   | ESI+      | 138.0919 | 2-Hydroxyphenethylamine          | 138.0919[M+H]+,122.0732[M+H-H2N]+,109.0653[M+H-CH3N]+                                                                                                                      |
| 1.14   | ESI+      | 121.0654 | Phenylacetaldehyde               | 121.0653[M+H]+, 106.0782[M+H-O]+                                                                                                                                           |
| 1.23   | ESI-      | 191.0195 | 2,3-Diketo-L-gulonate            | 173.0086[M-H]-,147.0293[M-H-CO2]-,129.0188[M-H-CH2O3]-,112.0160[M-H-CH3O4]-, 110.9718[M-H-C2H8O3]-                                                                         |
| 1.37   | ESI+      | 282.1208 | 2'-O-Methyladenosine             | 282.1202[M+H]+,265.1175[M+H-HO]+,178.0729[M+H-C4H8O3]+,133.0388[M+H-C6H13O4]+,109.0514[M+H-C7H11NO4]+                                                                      |
| 1.43   | ESI-      | 231.0979 | 4-butanoate                      | 189.1239[M-H-CO2]-,171.0770[M-H-C2H4O2]-,153.0664[M-H-C2H6O3]-,145.0739[M-H-C3H4NO2]-,128.0348[M-H-C4H9NO2]-,126.0191[M-H-C4H11NO2]-, 82.0293[M-H-C5H11NO4]-               |
| 1.51   | ESI+      | 314.1226 | Tyramine glucuronide             | 314.1240[M+H]+,271.1182[M+H-CHNO]+,227.0919[M+H-C3H5NO2]+,210.0892[M+H-C3H6NO3]+,179.0708[M+H-C4H9NO4]+,151.0759[M+H-C5H9NO5]+, 121.0891[M+H-C6H9O7]+                      |
| 1.94   | ESI+      | 330.0611 | Adenosine2',3'-cyclic phosphate  | 330.0603[M+H]+,312.0498[M+H-H2O]+,269.0314[M+H-C2H5O2]+,232.0834[M+H-H3O4P]+,204.0885[M+H-CH3O5P]+,177.0191[M+H-C5H5N4O2]+,151.0160[M+H-C6H5N5O2]+,119.9976[M+H-C7H8N5O3]+ |

|      |      |          |                                          |                                                                                                                                                                                                                                                                                                                                                                                                                                                                                      |
|------|------|----------|------------------------------------------|--------------------------------------------------------------------------------------------------------------------------------------------------------------------------------------------------------------------------------------------------------------------------------------------------------------------------------------------------------------------------------------------------------------------------------------------------------------------------------------|
| 1.99 | ESI+ | 166.0504 | 4-Pyridoxolactone                        | 166.0504[M+H] <sup>+</sup> ,148.0399[M+H-H <sub>2</sub> O] <sup>+</sup> ,121.0528[M+H-CHO <sub>2</sub> ] <sup>+</sup> ,109.0528[M+H-C <sub>2</sub> H <sub>2</sub> O <sub>2</sub> ] <sup>+</sup>                                                                                                                                                                                                                                                                                      |
| 2.00 | ESI+ | 346.0558 | Guanosine2',3'-cyclic phosphate          | 346.0553[M+H] <sup>+</sup> ,330.0603[M+H-O] <sup>+</sup> ,266.0889[M+H-HO <sub>3</sub> P] <sup>+</sup> ,230.0314[M+H-CH <sub>9</sub> O <sub>4</sub> P] <sup>+</sup> ,197.0100[M+H-CH <sub>12</sub> NO <sub>5</sub> P] <sup>+</sup> ,152.0698[M+H-C <sub>4</sub> H <sub>5</sub> NO <sub>6</sub> P] <sup>+</sup> ,135.0671[M+H-C <sub>4</sub> H <sub>6</sub> NO <sub>7</sub> P] <sup>+</sup> ,110.0480[M+H-C <sub>5</sub> H <sub>7</sub> N <sub>3</sub> O <sub>6</sub> P] <sup>+</sup> |
| 2.20 | ESI+ | 130.0867 | Pipecolic acid                           | 130.0868[M+H] <sup>+</sup> , 114.0919[M+H-O] <sup>+</sup>                                                                                                                                                                                                                                                                                                                                                                                                                            |
| 2.34 | ESI+ | 189.1239 | Glycyl-L-leucine                         | 172.1212[M+H-HO] <sup>+</sup> ,154.0868[M+H-H <sub>5</sub> NO] <sup>+</sup> ,144.1025[M+H-CH <sub>3</sub> NO] <sup>+</sup> ,120.0449[M+H-CH <sub>11</sub> NO <sub>2</sub> ] <sup>+</sup> ,101.1204[M+H-C <sub>2</sub> H <sub>2</sub> NO <sub>3</sub> ] <sup>+</sup>                                                                                                                                                                                                                  |
| 2.47 | ESI+ | 168.0659 | Pyridoxal                                | 168.0661[M+H] <sup>+</sup> ,153.0790[M+H-O] <sup>+</sup> ,126.0681[M+H-CNO] <sup>+</sup> ,104.0262[M+H-CH <sub>6</sub> NO <sub>2</sub> ] <sup>+</sup>                                                                                                                                                                                                                                                                                                                                |
| 2.75 | ESI+ | 209.0928 | Formyl-5-hydroxykynurenamine             | 209.0926[M+H] <sup>+</sup> ,192.0899[M+H-HO] <sup>+</sup> ,181.0977[M+H-CO] <sup>+</sup> ,166.0868[M+H-CHNO] <sup>+</sup> ,148.0762[M+H-CH <sub>3</sub> NO <sub>2</sub> ] <sup>+</sup> ,135.0684[M+H-C <sub>2</sub> H <sub>4</sub> NO <sub>2</sub> ] <sup>+</sup> ,126.0344[M+H-CH <sub>9</sub> NO <sub>3</sub> ] <sup>+</sup>                                                                                                                                                       |
| 3.21 | ESI- | 197.0450 | 3-(3,4-Dihydroxyphenyl)lactic acid       | 197.0450[M-H] <sup>-</sup> ,182.0579[M-H-O] <sup>-</sup> ,167.0708[M-H-O <sub>2</sub> ] <sup>-</sup> ,138.0681[M-H-CO <sub>3</sub> ] <sup>-</sup> , 109.0290[M-H-C <sub>3</sub> H <sub>4</sub> O <sub>3</sub> ] <sup>-</sup>                                                                                                                                                                                                                                                         |
| 3.45 | ESI- | 194.0450 | Dopaquinone                              | 194.0453[M-H] <sup>-</sup> ,151.0269[M-H-C <sub>2</sub> H <sub>3</sub> O] <sup>-</sup> ,123.0446[M-H-C <sub>2</sub> HNO <sub>2</sub> ] <sup>-</sup> , 121.0290[M-H-C <sub>2</sub> H <sub>3</sub> NO <sub>2</sub> ] <sup>-</sup>                                                                                                                                                                                                                                                      |
| 3.57 | ESI- | 181.0498 | 3-Methoxy-4-hydroxyphenylglycol aldehyde | 181.0501[M-H] <sup>-</sup> ,163.0395[M-H-H <sub>2</sub> O] <sup>-</sup> ,135.0082[M-H-C <sub>2</sub> H <sub>6</sub> O] <sup>-</sup> ,119.0133[M-H-C <sub>2</sub> H <sub>6</sub> O <sub>2</sub> ] <sup>-</sup> , 107.0133[M-H-C <sub>3</sub> H <sub>6</sub> O <sub>2</sub> ] <sup>-</sup>                                                                                                                                                                                             |
| 3.92 | ESI- | 180.0657 | Beta-Tyrosine                            | 180.0661[M-H] <sup>-</sup> ,167.0708[M-H-N] <sup>-</sup> ,152.0837[M-H-NO] <sup>-</sup> ,137.0841[M-H-CO <sub>2</sub> ] <sup>-</sup> , 108.0575[M-H-C <sub>2</sub> H <sub>2</sub> NO <sub>2</sub> ] <sup>-</sup>                                                                                                                                                                                                                                                                     |
| 3.93 | ESI+ | 182.0819 | L-Tyrosine                               | 182.0817[M+H] <sup>+</sup> ,162.0555[M+H-H <sub>4</sub> O] <sup>+</sup> ,138.0919[M+H-CO <sub>2</sub> ] <sup>+</sup> ,117.0340[M+H-CH <sub>7</sub> NO <sub>2</sub> ] <sup>+</sup> , 109.0653[M+H-C <sub>2</sub> H <sub>3</sub> NO <sub>2</sub> ] <sup>+</sup>                                                                                                                                                                                                                        |
| 4.26 | ESI- | 179.0343 | 3,4-Dihydroxy-trans-cinnamate            | 179.0344[M-H] <sup>-</sup> ,163.0395[M-H-O] <sup>-</sup> ,147.0446[M-H-O <sub>2</sub> ] <sup>-</sup> ,135.0446[M-H-CO <sub>2</sub> ] <sup>-</sup> , 121.0290[M-H-C <sub>2</sub> H <sub>2</sub> O <sub>2</sub> ] <sup>-</sup>                                                                                                                                                                                                                                                         |
| 4.38 | ESI- | 165.0550 | Homovanillin                             | 165.0552[M-H] <sup>-</sup> ,150.0317[M-H-CH <sub>3</sub> ] <sup>-</sup> ,139.0759[M-H-CO] <sup>-</sup> ,121.0290[M-H-C <sub>2</sub> H <sub>4</sub> O] <sup>-</sup> ,119.0133[M-H-C <sub>2</sub> H <sub>6</sub> O] <sup>-</sup>                                                                                                                                                                                                                                                       |
| 4.48 | ESI+ | 167.0708 | D-Phenyllactic acid                      | 167.0708[M+H] <sup>+</sup> ,149.0603[M+H-                                                                                                                                                                                                                                                                                                                                                                                                                                            |

|      |      |          |                                             |                                                                                                                                                  |
|------|------|----------|---------------------------------------------|--------------------------------------------------------------------------------------------------------------------------------------------------|
| 4.51 | ESI- | 134.0615 | N-Acetylarylamine                           | H2O]+,130.0419[M+H-H5O2]+,121.0653[M+H-CH2O2]+, 107.0861[M+H-CO3]+<br>134.0606[M-H]-,93.0578[M-H-C2HO]-,92.0500[M-H-C2H2O]-,77.0391[M-H-C2H3NO]- |
| 5.51 | ESI+ | 181.0494 | 4-Hydroxyphenylpyruvic acid                 | 181.0501[M+H]+,163.0395[M+H-H2O]+,149.0603[M+H-O2]+,137.0603[M+H-CO2]+,135.0810[M+H-O3]+,105.0340[M+H-C2H4O3]+                                   |
| 5.70 | ESI- | 194.0453 | Leucodopachrome                             | 194.0453[M-H]-,179.0582[M-H-O]-,150.0555[M-H-CO2]-,121.0164[M-H-C3H5O2]-, 93.0340[M-H-C3H3NO3]-                                                  |
| 5.76 | ESI+ | 181.0500 | 2-Hydroxy-3-(4-hydroxyphenyl)propenoic acid | 181.0501[M+H]+,164.0473[M+H-HO]+,135.0446[M+H-CH2O2]+,121.0653[M+H-CO3]+, 107.0497[M+H-C2H2O3]+                                                  |
| 5.91 | ESI+ | 167.0708 | Phenyllactic acid                           | 167.0708[M+H]+,151.0759[M+H-O]+,133.0653[M+H-H2O2]+,120.0939[M+H-O3]+, 107.0861[M+H-CO3]+                                                        |
| 6.18 | ESI- | 204.0658 | Indolelactic acid                           | 204.0661[M-H]-,186.0555[M-H-H2O]-,158.0606[M-H-CH2O2]-, 130.0657[M-H-C2H2O3]-,116.0473[M-H-C6H2N]-                                               |
| 7.77 | ESI- | 193.0345 | 3-Dehydro-L-gulonate                        | 179.0556[M-H-O]-,151.0606[M-H-CO2]-,130.9981[M-H-C2H6O2]-, 112.9875[M-H-C2H8O3]-, 100.9875[M-H-C3H8O3]-                                          |

**Table.S4** Identification and change trends of the differential metabolites.

| NO. | Postulated Identity                      | Y | L | Z | H |
|-----|------------------------------------------|---|---|---|---|
| 1   | Galactonic acid                          | — | — | — | — |
| 2   | 3-Keto-b-D-galactose                     | — | — | — | √ |
| 3   | N-Acetylgalactosamine 4-sulphate         | — | — | √ | √ |
| 4   | 1-Methylhistidine                        | — | √ | √ | √ |
| 5   | 2-Hydroxyphenethylamine                  | √ | √ | √ | √ |
| 6   | Phenylacetaldehyde                       | √ | √ | √ | √ |
| 7   | 2,3-Diketo-L-gulonate                    | — | — | — | — |
| 8   | 2'-O-Methyladenosine                     | — | — | — | — |
| 9   | 4-butanoate                              | — | — | — | — |
| 10  | Tyramine glucuronide                     | — | √ | — | √ |
| 11  | Adenosine2',3'-cyclic phosphate          | — | — | √ | √ |
| 12  | 4-Pyridoxolactone                        | √ | — | — | √ |
| 13  | Guanosine2',3'-cyclic phosphate          | √ | — | — | — |
| 14  | Pipecolic acid                           | √ | √ | √ | √ |
| 15  | Glycyl-L-leucine                         | — | — | — | √ |
| 16  | Pyridoxal                                | — | — | — | — |
| 17  | Formyl-5-hydroxykynurenamine             | — | — | — | √ |
| 18  | 3-(3,4-Dihydroxyphenyl)lactic acid       | √ | — | — | √ |
| 19  | Dopaquinone                              | — | √ | √ | √ |
| 20  | 3-Methoxy-4-hydroxyphenylglycol aldehyde | √ | — | — | — |
| 21  | Beta-Tyrosine                            | — | — | — | √ |
| 22  | L-Tyrosine                               | — | √ | √ | √ |
| 23  | 3,4-Dihydroxy-trans-cinnamate            | √ | — | — | — |
| 24  | Homovanillin                             | — | — | — | — |
| 25  | D-Phenyllactic acid                      | — | — | — | — |
| 26  | N-Acetylarylamine                        | √ | √ | √ | √ |
| 27  | 4-Hydroxyphenylpyruvic acid              | √ | √ | √ | √ |
| 28  | Leucodopachrome                          | — | — | — | — |

---

|    |                                             |   |   |   |   |
|----|---------------------------------------------|---|---|---|---|
| 29 | 2-Hydroxy-3-(4-hydroxyphenyl)propenoic acid | — | — | — | — |
| 30 | Phenyllactic acid                           | √ | — | — | √ |
| 31 | Indolelactic acid                           | √ | — | — | — |
| 32 | 3-Dehydro-L-gulonate                        | — | — | — | — |

---

**Note:** Y: Positive control group; L: Luozhen capsule low dose group; Z: Luozhen capsule medium dose group; H: Luozhen capsule high dose group. √ indicates a drug callback; - indicates that the drug has no callback.
